# Supplementary material
Source: publisher figshare collection journal article supplement (https://aacr.figshare.com/articles/dataset/_/22495113)

# CDCP1

Tissue

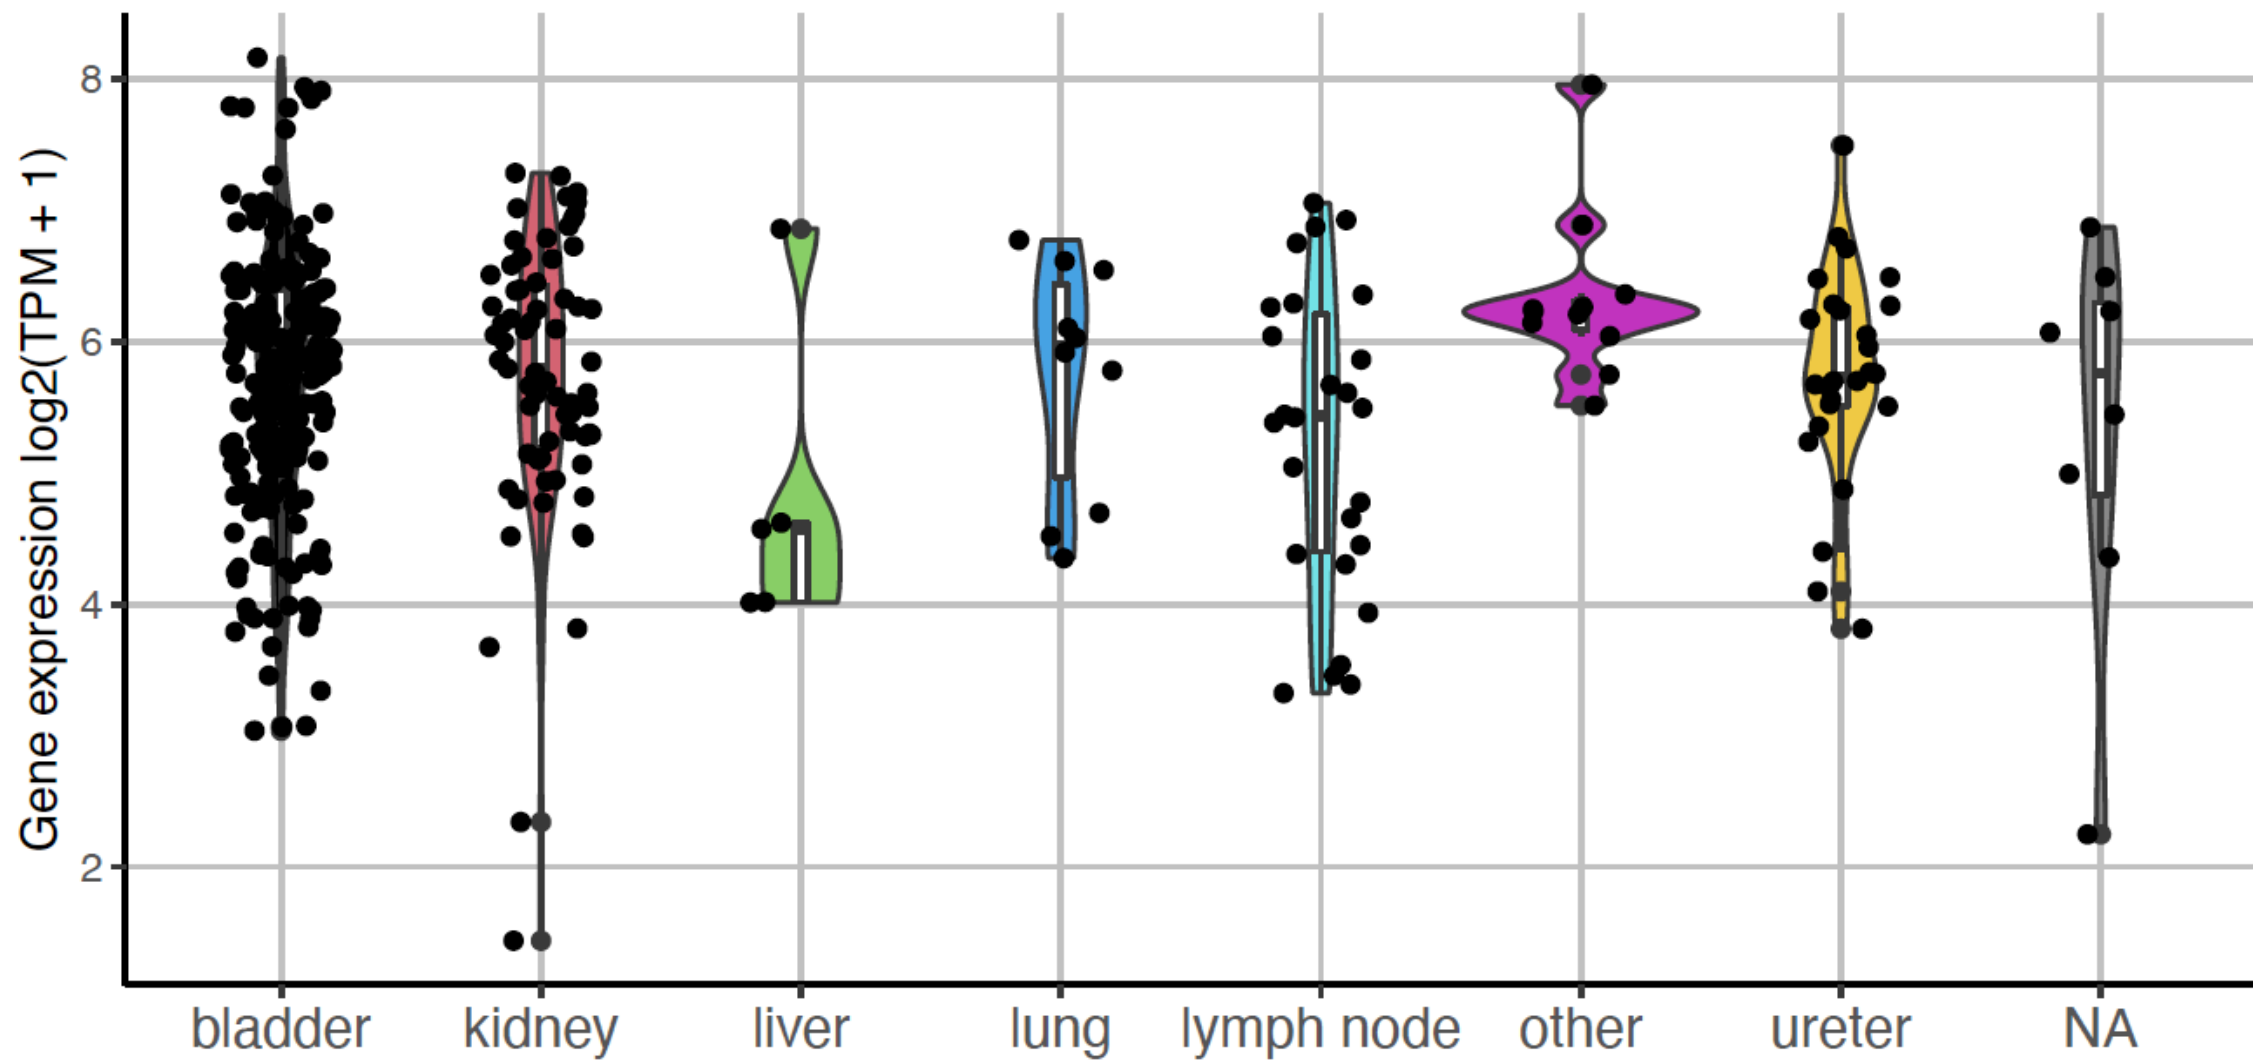

Supplement: Supplementary file 1 [file 39952176]
